# Supplementary material for: Preventive Effects of a Natural Anti-Inflammatory Agent, Astragaloside IV, on Ischemic Acute Kidney Injury in Rats
Source: PubMed Central journal article supplement (PMC3703719; doi:10.1155/2013/284025), 2013-06-19

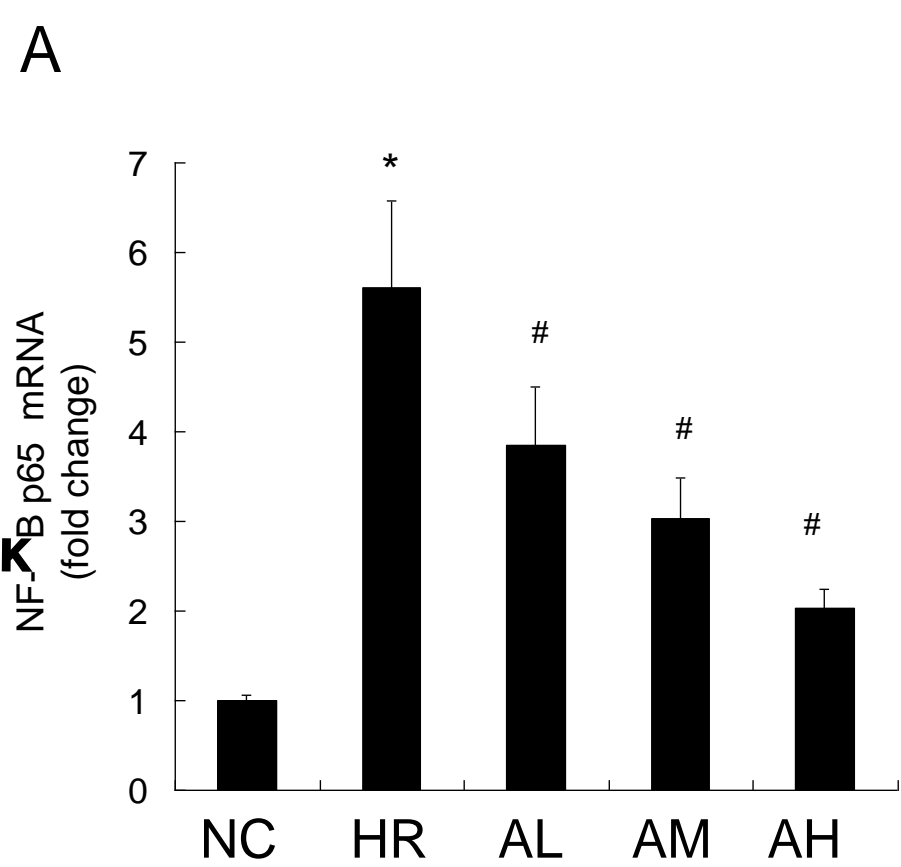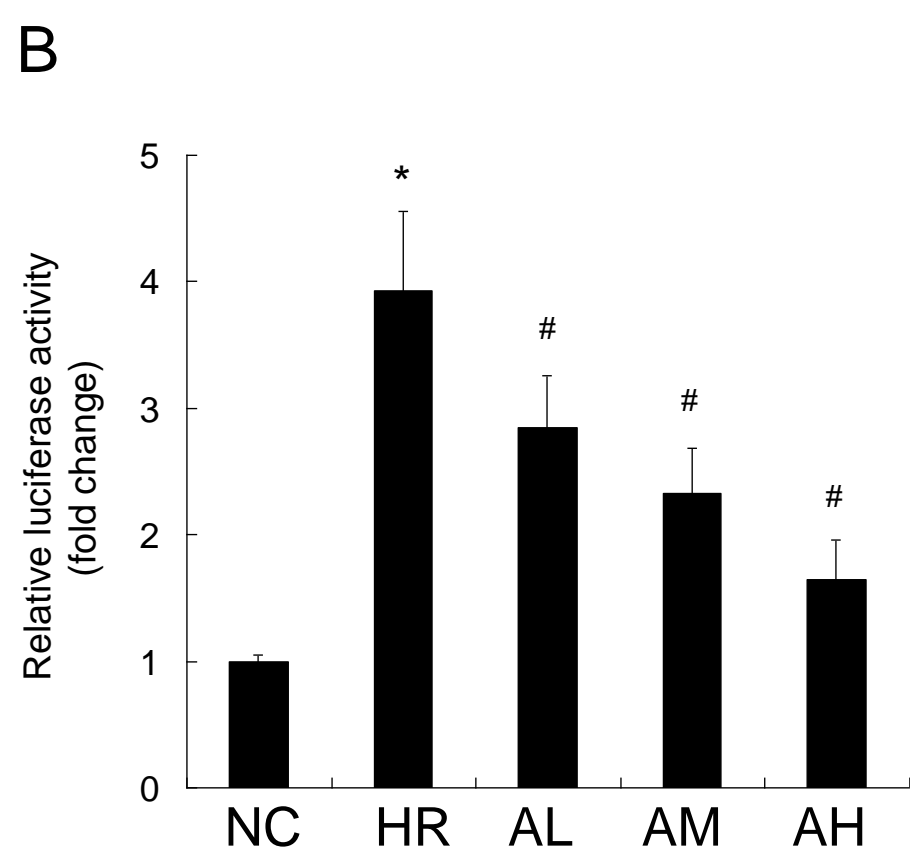

Supplement: 284025.f3.pdf [file 284025.f3.pdf]
